# Supplementary material for: OsTBP2.1, a TATA-Binding Protein, Alters the Ratio of OsNRT2.3b to OsNRT2.3a and Improves Rice Grain Yield
Source: MDPI journal article supplement (doi:10.3390/ijms231810795), 2022-09-16
Supplement: s1 [file s1]

Figure S1

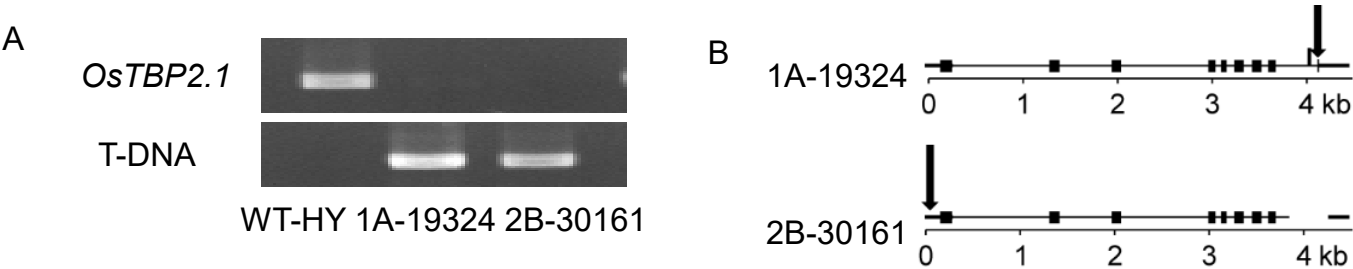

Figure S2

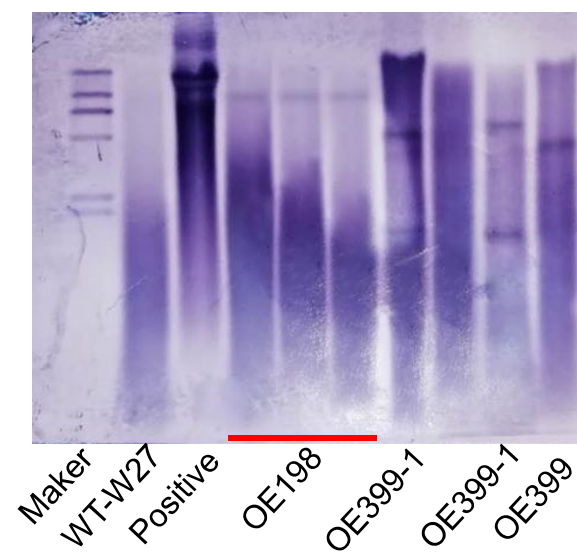

Figure S3

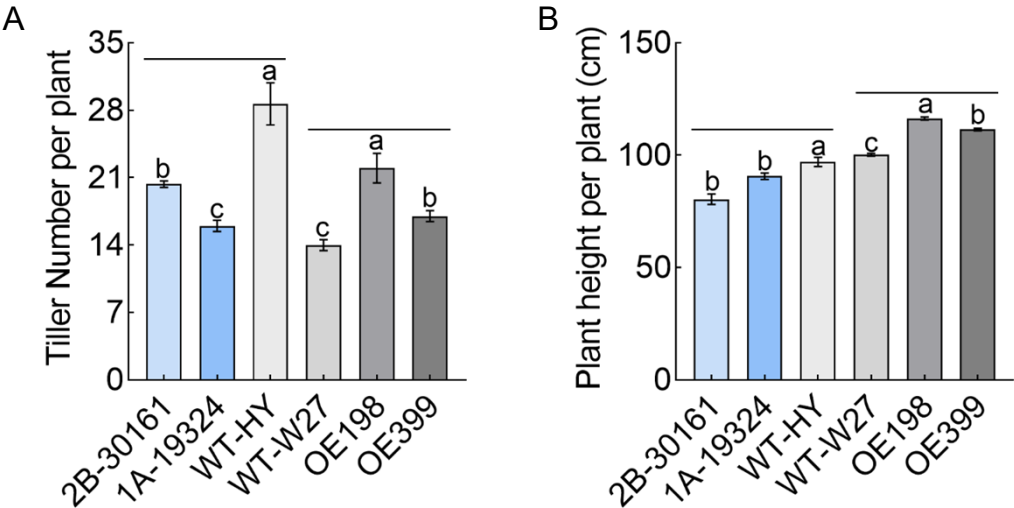

Figure S4

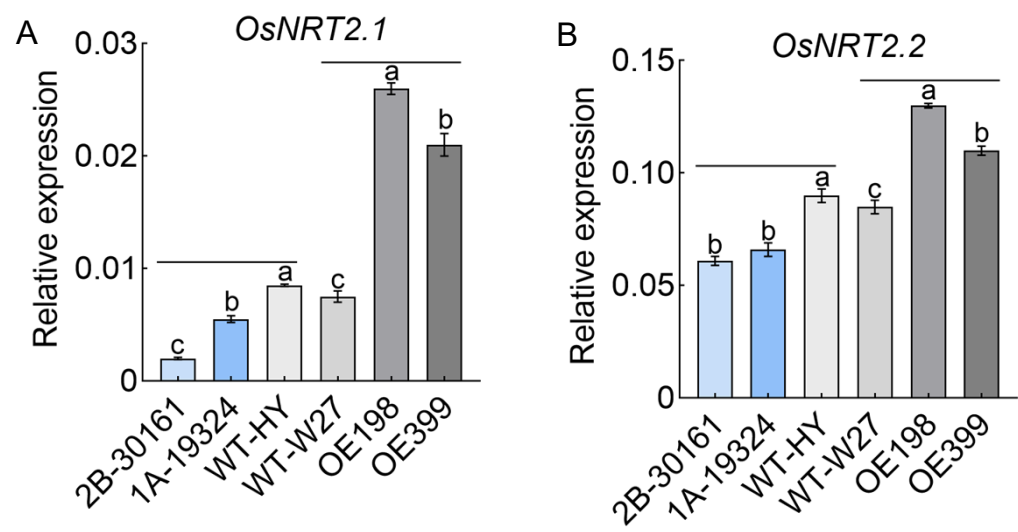

Figure S5

```
OsNRT2.3a TCCACGTTTCGCCGCGCCGCCGCTGCTGCCGCTCATCCGCGACACCCTCGGGCTCACGGCC
          |||||
OsNRT2.3b TCCACGTTT.....
OsNRT2.3a ACGGACATCGGCAACGCCGGGATCGCGTCCGTGTCGGGCGCCGTGTTTCGCGCGTCTGGCC
          |||||
OsNRT2.3b .....GCCGTGTTTCGCGCGTCTGGCC
OsNRT2.3a ATGGGCACGGCGTGCGACCTGGTCGGGCCCAGGCTGGCCTCCGCGTCTCTGATCCTCCTC
          |||||
OsNRT2.3b ATGGGCACGGCGTGCGACCTGGTCGGGCCCAGGCTGGCCTCCGCGTCTCTGATCCTCCTC
OsNRT2.3a ACCACACCGGCGGTGTACTGCTCCTCCATCATCCAGTCCCCGTCGGGGTACCTCCTCGTG
          |||||
OsNRT2.3b ACCACACCGGCGGTGTACTGCTCCTCCATCATCCAGTCCCCGTCGGGGTACCTCCTCGTG
ZIIIB    CGCTTCTTCACGGGCATCTCCCTGCAGGTCGCCACATTAGCAATGCCACATTAGCAATGC
          |||||
ZIIIB    CGCTTCTTCACGGGCATCTCCCTGCAGGTCGCCACATTAGCAATGCCACATTAGCAATGC
ZIIIB    CGACTCTAGAGGATCCC
          |||||
ZIIIB    CGACTCTAGAGGATCCC
```

Table S1 The primer sequences used in build vectors

|                                                    | Primer name        | Sequences (5' to 3')            |
|----------------------------------------------------|--------------------|---------------------------------|
| Different length <i>OsNRT2.3</i><br>promoter lines | 141 bp-F           | aaAAGCTTACCCAACCATCGCGCCACGC    |
|                                                    | 180 bp-F           | aaAAGCTTCTTTATTCATTTTCTCTCCAC   |
|                                                    | 243 bp-F           | aaAAGCTTCGACGCGAGCGCGGAGACGG    |
|                                                    | 697 bp-F           | aaAAGCTTGAGTAGATGAGAGAGAGGATG   |
|                                                    | 1505 bp-F          | aaAAGCTTATATAACCGTGAGATTTGATGC  |
|                                                    | Different length-R | aaTCTAGACTCCAACACGTGGTAGCAAG    |
|                                                    | <i>OsNRT2.3</i> -F | aaTCTAGAATGGAGGCTA AGCCGGTGGC   |
|                                                    | <i>OsNRT2.3</i> -R | aaGGATCCATGCCCCGTGA AGAAGCGCACG |
| <i>pUbi::OsTBP2.1</i>                              | <i>OsTBP2.1</i> -F | AAAGGATCCGGTTTTTGGGGGTGTGTAT    |
|                                                    | <i>OsTBP2.1</i> -R | AAAGGTACCTTGCTGGACTTTTCTGAAC    |
| <i>OsTBP2.1</i> mutant lines                       | 1A-19324-F         | TGAAGACCGGACAATGGATC            |
|                                                    | 1A-19324-R         | ATTATTGCCGGCAATAAGCC            |
|                                                    | 2B-30161-F         | CTGCCTTACGAGCTGACCTC            |
|                                                    | 2B-30161-R         | CATACACACCCCCAAAAACC            |

Table S2 The primer sequences used in real-time PCR

|                                                    | Primer name                 | Sequences (5' to 3')  |
|----------------------------------------------------|-----------------------------|-----------------------|
| Different length <i>OsNRT2.3</i><br>promoter lines | <i>OsNRT2.3a</i> -F         | GCTCATCCGCGACACCCT    |
|                                                    | <i>OsNRT2.3b</i> -F         | CACGTTCGCCGTGTTC      |
|                                                    | <i>OsNRT2.3a/b</i> -ZIIIB-R | ATTGCTAATGTGGCGACCT   |
| <i>OsTBP2.1</i> transgenic lines                   | <i>OsNRT2.3</i> -F          | CGCTGCTGCCGCTCATCCG   |
|                                                    | <i>OsNRT2.3</i> -R          | CCGTGCCCATGGCCAGAC    |
|                                                    | <i>OsTBP2.1</i> -F          | AATCAGGCTGGAGGGACTTG  |
|                                                    | <i>OsTBP2.1</i> -R          | TCAAAGGCGGTATACGTCTCA |
|                                                    | <i>OsACTIN</i> -F           | CAACACCCCTGCTATGTACG  |
|                                                    | <i>OsACTIN</i> -R           | CATCACCAGAGTCCAACACAA |
